# Supplementary material
Source: publisher figshare collection journal article supplement (https://sage.figshare.com/ndownloader/files/17470742)
Supplement: Supplementary file 1 [file 17470742]

# Correlation of Baseline Plasma and Inguinal Connective Tissue Metalloproteinases and Their Inhibitors With Late High-Pressure Endoleak After Endovascular Aneurysm Repair: Long-term Results

George S. Georgiadis et al. *J Endovasc Ther.* 2019;26(6).

**Supplementary Table 1.** Linear Regression Analysis<sup>a</sup> of Baseline Circulating and Tissue Biomarkers With the Presence of Hernia at Primary Endovascular Aneurysm Repair.

|                                 | Coefficient | SE    | Wald $\chi^2$ | OR (95% CI)             | p     |
|---------------------------------|-------------|-------|---------------|-------------------------|-------|
| Tissue homogenate               |             |       |               |                         |       |
| TIMP-1                          | 0.098       | 0.094 | 1.080         | 1.102 (0.917 to 1.325)  | 0.299 |
| TIMP-2                          | 1.218       | 0.811 | 2.259         | 3.381 (0.690 to 16.557) | 0.133 |
| MMP-9 (pro- and active)         | 0.245       | 0.154 | 2.541         | 1.277 (0.945 to 1.726)  | 0.111 |
| MMP-2 (pro- and active)         | −0.104      | 0.199 | 0.274         | 0.901 (0.609 to 1.332)  | 0.600 |
| Blood sample                    |             |       |               |                         |       |
| TIMP-1                          | 0.055       | 0.124 | 0.197         | 1.057 (0.828 to 1.349)  | 0.657 |
| TIMP-2                          | −0.181      | 0.240 | 0.570         | 0.834 (0.521 to 1.336)  | 0.450 |
| MMP-9 (pro- and active)         | −0.106      | 0.049 | 4.785         | 0.899 (0.817 to 0.989)  | 0.029 |
| MMP-2 (pro- and active)         | 0.035       | 0.062 | 0.308         | 1.035 (0.916 to 1.170)  | 0.579 |
| Zymography of tissue homogenate |             |       |               |                         |       |
| ProMMP-9                        | −0.020      | 0.020 | 1.019         | 0.980 (0.942 to 1.019)  | 0.313 |
| Active MMP-9                    | 0.011       | 0.049 | 0.049         | 1.011 (0.919 to 1.112)  | 0.825 |
| ProMMP-2                        | 0.007       | 0.024 | 0.091         | 1.007 (0.962 to 1.055)  | 0.763 |
| Active MMP-2                    | 0.030       | 0.035 | 0.723         | 1.030 (0.962 to 1.103)  | 0.395 |
| Total (pro- and active) MMP-9   | −0.021      | 0.017 | 1.478         | 0.980 (0.947 to 1.013)  | 0.224 |
| % Active MMP-9                  | 0.023       | 0.030 | 0.587         | 1.023 (0.965 to 1.084)  | 0.444 |
| Total (pro- and active) MMP-2   | 0.013       | 0.014 | 0.819         | 1.013 (0.985 to 1.041)  | 0.365 |
| % Active MMP-2                  | −1.193      | 0.028 | 0.134         | 1.010 (0.956 to 1.068)  | 0.715 |

Abbreviations: CI, confidence interval; MMP, matrix metalloproteinases; OR, odds ratio; SE, standard error; TIMP, tissue inhibitors of metalloproteinases.

<sup>a</sup>Degree of freedom equals 1.

# Correlation of Baseline Plasma and Inguinal Connective Tissue Metalloproteinases and Their Inhibitors With Late High-Pressure Endoleak After Endovascular Aneurysm Repair: Long-term Results

George S. Georgiadis et al. *J Endovasc Ther.* 2019;26(6).

**Supplementary Table 2.** Multiple Linear Regression Analysis to Test for Baseline Biomarkers Predicting Late Endoleak in Patients With vs Without a Hernia Prior to Endovascular Aneurysm Repair.

| Parameter                       | Coefficient | t      | p     |
|---------------------------------|-------------|--------|-------|
| Tissue homogenate               |             |        |       |
| TIMP-1                          | −0.004      | −0.021 | 0.984 |
| TIMP-2                          | −0.018      | −0.109 | 0.913 |
| MMP-9 (pro- and active)         | −0.005      | −0.033 | 0.974 |
| MMP-2 (pro- and active)         | −0.012      | −0.087 | 0.931 |
| Hernia present                  | 0.134       | 0.993  | 0.325 |
| Blood sample                    |             |        |       |
| TIMP-1                          | −0.002      | −0.012 | 0.990 |
| TIMP-2                          | 0.011       | 0.083  | 0.934 |
| MMP-9 (pro- and active)         | 0.000       | −0.002 | 0.998 |
| MMP-2 (pro- and active)         | −0.760      | −0.565 | 0.574 |
| Hernia present                  | 0.136       | 0.997  | 0.323 |
| Zymography of tissue homogenate |             |        |       |
| Pro-MMP-9                       | 0.357       | 2.594  | 0.012 |
| Active MMP-9                    | −0.259      | −1.891 | 0.044 |
| Pro-MMP-2                       | −0.093      | −0.605 | 0.548 |
| Active MMP-2                    | 0.182       | 1.174  | 0.245 |
| Hernia present                  | 0.139       | 1.124  | 0.266 |
| Total (pro- and active) MMP-9   | 0.264       | 0.426  | 0.088 |
| % Active MMP-9                  | −0.173      | 1.733  | 0.273 |
| Total (pro- and active) MMP-2   | 0.120       | −1.106 | 0.380 |
| % Active MMP-2                  | −0.147      | 0.885  | 0.296 |
| Hernia present                  | 0.154       | 1.214  | 0.230 |

Abbreviations: MMP, matrix metalloproteinases; TIMP, tissue inhibitors of metalloproteinases.

# Correlation of Baseline Plasma and Inguinal Connective Tissue Metalloproteinases and Their Inhibitors With Late High-Pressure Endoleak After Endovascular Aneurysm Repair: Long-term Results

George S. Georgiadis et al. *J Endovasc Ther.* 2019;26(6).

**Supplementary Table 3.** Multiple Linear Regression Analysis to Test for Baseline Biomarkers Predicting Late Endoleak in Patients Presenting With Moderate vs Large ( $\geq 60$  mm) Aneurysms.

| Parameter                       | Coefficient | t      | p     |
|---------------------------------|-------------|--------|-------|
| Tissue homogenate               |             |        |       |
| TIMP-1                          | 0.020       | 0.108  | 0.914 |
| TIMP-2                          | 0.025       | 0.156  | 0.876 |
| MMP-9 (pro- and active)         | 0.010       | 0.066  | 0.948 |
| MMP-2 (pro- and active)         | −0.030      | −0.221 | 0.826 |
| Large AAA present               | 0.033       | 0.245  | 0.807 |
| Blood sample                    |             |        |       |
| TIMP-1                          | 0.003       | 0.021  | 0.983 |
| TIMP-2                          | −0.002      | −0.011 | 0.991 |
| MMP-9 (pro- and active)         | −0.039      | −0.290 | 0.773 |
| MMP-2 (pro- and active)         | −0.070      | −0.510 | 0.612 |
| Large AAA present               | 0.005       | 0.037  | 0.971 |
| Zymography of tissue homogenate |             |        |       |
| Pro-MMP-9                       | 0.336       | 2.439  | 0.018 |
| Active MMP-9                    | −0.256      | −1.886 | 0.041 |
| Pro-MMP-2                       | −0.083      | −0.540 | 0.591 |
| Active MMP-2                    | 0.180       | 1.164  | 0.249 |
| Large AAA present               | −0.030      | −0.244 | 0.808 |
| Total (pro- and active) MMP-9   | 0.227       | 1.560  | 0.124 |
| % Active MMP-9                  | −0.147      | −1.000 | 0.321 |
| Total (pro- and active) MMP-2   | 0.132       | 0.972  | 0.335 |
| % Active MMP-2                  | −0.153      | −1.095 | 0.278 |
| Large AAA present               | −0.051      | −0.400 | 0.691 |

Abbreviations: AAA, abdominal aortic aneurysm; MMP, matrix metalloproteinases; TIMP, tissue inhibitors of metalloproteinases.
